1 **A scoping review protocol on *in vivo* human plastic exposure and health impacts**

2

3 Louise M. Goodes<sup>1,2</sup>, Enoch V.S. Wong<sup>1</sup>, Jennifer Alex<sup>1</sup>, Louise Mofflin<sup>1</sup>, Priyanka  
4 Toshniwal<sup>1</sup>, Manuel Brunner<sup>1,3</sup>, Terena Solomons<sup>4</sup>, Emily White<sup>1</sup>, Omrik Choudhury<sup>1</sup>, Bhedita  
5 J. Seewoo<sup>1,2</sup>, Yannick R. Mulders<sup>1</sup>, Tristan Dale<sup>1,5,6</sup>, Hamish J. Newman<sup>1,7,8</sup>, Andrew B. Lowe<sup>9</sup>,  
6 Delia V. Hendrie<sup>10</sup>, Christos Symeonides<sup>1,11</sup>, Sarah A. Dunlop<sup>1,2</sup>

7

8 <sup>1</sup> Minderoo Foundation, 171 - 173 Mounts Bay Road, Perth, WA 6000, Australia

9 <sup>2</sup> School of Biological Sciences, The University of Western Australia, 35 Stirling Highway,  
10 Crawley, WA 6009, Australia

11 <sup>3</sup> School of Molecular Sciences, The University of Western Australia, 35 Stirling Highway,  
12 Crawley, WA 6009, Australia

13 <sup>4</sup> Health and Medical Sciences (Library), The University of Western Australia, 35 Stirling  
14 Highway, Crawley, WA 6009, Australia

15 <sup>5</sup> Fiona Stanley Hospital, 11 Warren Drive, Murdoch, WA 6150, Australia

16 <sup>6</sup> UWA Medical School, Faculty of Health and Medical Sciences, The University of Western  
17 Australia, 35 Stirling Highway, Crawley, WA 6009, Australia

18 <sup>7</sup> Sir Charles Gairdner Hospital, Hospital Ave, Nedlands, WA 6009, Australia

19 <sup>8</sup> School of Human Sciences, The University of Western Australia, 35 Stirling Highway,  
20 Crawley, WA 6009, Australia

21 <sup>9</sup> School of Molecular & Life Sciences, Curtin University, Kent St, Bentley WA 6102,  
22 Australia

23 <sup>10</sup> School of Population Health, Curtin University, Kent St, Bentley WA 6102, Australia

24 <sup>11</sup> Murdoch Children's Research Institute, Royal Children's Hospital, 50 Flemington Rd,  
25 Parkville, VIC 3052, Australia

26 **ABSTRACT**

27 **Background:** Global plastic production has increased exponentially since the 1960s, with  
28 more than 6300 million metric tons of plastic waste generated to date. Studies have found a  
29 range of human health impacts associated with exposure to plastic chemicals. However, only  
30 a fraction of plastic chemicals used have been studied *in vivo*, and then often in animals, for  
31 acute toxicological effects. With many questions still unanswered about how long-term  
32 exposure to plastic impacts human health, there is an urgent need to map human *in vivo* research  
33 conducted to date, casting a broad net by searching terms for a comprehensive suite of plastic  
34 chemical exposures and the widest range of health domains.

35

36 **Methods:** This protocol describes a scoping review that will follow the recommended  
37 framework outlined in *2017 Guidance for the Conduct of Joanna Briggs Institute (JBI) Scoping*  
38 *Reviews*, to be reported in accordance with *Preferred Reporting Items for Systematic Reviews*  
39 *and Meta-Analyses extension for Scoping Reviews (PRISMA-ScR) Checklist*. A literature  
40 search of primary clinical studies in English from 1960 onwards will be conducted in  
41 MEDLINE (Ovid) and EMBASE (Ovid) databases. References eligible for inclusion will be  
42 identified through a quality-controlled, multi-level screening process. Extracted data will be  
43 presented in diagrammatic and tabular form, with a narrative summary addressing the review  
44 questions.

45

46 **Discussion:** This scoping review will comprehensively map the primary research undertaken  
47 to date on plastic exposure and human health. Secondary outputs will include extensive  
48 databases on plastic chemicals and human health outcomes/impacts.

49

50 **Keywords:** human, plastic, plastic chemicals, polymers, additives, exposure, health, toxicity

51

52 **Registration:** Open Science Framework (OSF)-Standard Pre-Data Collection Registration,  
53 <https://osf.io/gbxps> DOI: 10.17605/OSF.IO/GBXPS

54

## 55 **BACKGROUND**

56 Continuous human exposure to plastic chemicals has become inevitable due to its ubiquity in  
57 the environment (1,2). ‘Plastic’ is a broad term for material made up of polymers and usually  
58 a number of chemical additives that impart desirable properties, such as flexibility and fire  
59 resistance (3,4). We will use the term ‘plastic materials’ as an umbrella term inclusive of  
60 plastic chemicals, plastic products and plastic particles; and ‘plastic chemicals’ to refer to  
61 polymers, monomers and/or additives.

62

63 As of 2017, approximately 8300 million metric tons (Mt) of virgin plastic chemicals had been  
64 produced, and as of 2015, 6300 million Mt of plastic waste generated (5). While some of the  
65 plastic waste is recycled or incinerated (5), the majority accumulates in landfills or in the  
66 environment (5), as macroplastic debris in the oceans (6–8), as microparticles in air (9–11),  
67 micro- or nanoparticles in soils (12–14) and in water supplies (15–18).

68

69 Plastic materials are used in every aspect of our lives (19) and common routes of exposure to  
70 plastic chemicals and particles (20) include inhalation (21), ingestion (including trophic  
71 transfer) (22–24), and direct dermal contact (25–27). Furthermore, children are exposed  
72 prenatally to plastic chemicals through maternal and paternal exposure (28), as well as  
73 postnatally through breast milk (29).

74

75 Of the thousands of plastic chemicals in use globally today, more than 20% have been  
76 identified as substances of concern by the European Union on the basis of persistence,  
77 bioaccumulation and/or toxicity, while 39% remain unclassified in terms of hazard (30). Some  
78 plastic chemicals are persistent organic pollutants that are known to bioaccumulate in human  
79 fatty tissues (31). A growing body of evidence links human exposure to various plastic  
80 chemicals with adverse health impacts (32–35) and public concern about the threat of plastic  
81 pollution on our health is high (36). Despite this, research efforts have focused on a few plastic  
82 chemicals for which established measurement techniques exist (37) and for which a limited  
83 range of health impacts have been identified – primarily endocrine disruption (38–40),  
84 reproductive toxicity (41,42), carcinogenicity (43,44), metabolic and nutritional conditions  
85 (45), and neurodevelopment (46,47). The findings of these studies are often inconsistent, as  
86 plastic chemical exposure can show sex-specific effects (38), differentially affect  
87 developmental stages (48), have health outcomes in association with specific plastic chemical  
88 mixtures (38), and can elicit non-monotonic responses (34). There is insufficient published  
89 data on the toxicity of micro- and nano-plastics in humans (49,50), however an absence of  
90 evidence of toxicity does not equate to evidence of safety (51).

91

92 We are not aware of any sources or publications comprehensively summarising research  
93 conducted to date on how plastic chemicals and plastic particles are impacting human health,  
94 or which populations, demographically and geographically, have been studied in this respect.  
95 Preliminary searches conducted in Prospero, Epistimonikos, Cochrane, Medline (Ovid) and  
96 Embase (Ovid) databases in May 2020 did not identify any previous or current scoping review  
97 on this broad topic. A number of systematic and literature reviews were identified, focusing on  
98 a small number of classes of plastic chemicals, such as phthalates, and bisphenol A (52–55),  
99 and certain diseases associated with these chemical species (56,57). These systematic and

100 literature reviews addressed only a few specific chemicals and did not evaluate non disease-  
101 specific health domains, such as changes in gene expression, oxidative stress and the  
102 microbiome. Demographic and geographic bias (for example, due to social equity issues) were  
103 not evaluated, suggesting that many populations could be under-represented in the literature.  
104 For example, young children could be highly exposed and particularly vulnerable to the effects  
105 of some plastic chemicals (53,58), and populations in developing countries could be at  
106 increased exposure risk (59) due to a combination of higher plastic pollution burden (60),  
107 combined with inadequate waste management facilities and lower occupational health and  
108 safety regulations (61).

109

110 To demonstrate the scope of research conducted to date, and to inform future research efforts,  
111 we will conduct a scoping review to chart published primary human *in vivo* studies that  
112 investigated the relationship between exposure to plastic materials and human health since  
113 1960. The scoping review aims to summarise the research to date, identify knowledge gaps  
114 and provide a framework for future studies in areas requiring more in-depth research.

115

### 116 **Review question**

117 In primary human *in vivo* research conducted since 1960 on the effects of plastic materials on  
118 health, which plastic chemicals/particles and which health domains have (and have not) been  
119 investigated?

120

121 In relation to our main question, the following questions will inform sub-analyses:

- 122 1. Which populations (geographically, by age group, sex and general/special exposure  
123 risk status) have been examined?
- 124 2. Which study designs were adopted?

125 3. When were these studies conducted over time (Jan 1960–Jan 2021)?

126

127 **Inclusion and exclusion criteria**

128 The Population, Exposure and Outcome (PEO) mnemonic (Table 1) was created to construct  
129 clear inclusion criteria

130

131 Table 1: PEO framework for identifying the research question and inclusion criteria.

| <b>Criteria</b>   | <b>Determinants</b>                                                          |
|-------------------|------------------------------------------------------------------------------|
| <b>Population</b> | Global human populations of all ages, including the developing fetus         |
| <b>Exposure</b>   | Directly <i>in vivo</i> measured exposures to included plastic materials     |
| <b>Outcome</b>    | Direct <i>in vivo</i> physiological or psychological health outcome measures |

132

133 ***Population***

134 The review will consider studies that investigate any population globally, and any age group,  
135 including the developing fetus. Animal studies and *in vitro* human studies will be excluded.

136

137 ***Exposure***

138 Only *in vivo* directly measured exposures (i.e. via bio-samples, including for example blood,  
139 urine, breast milk and adipose tissue) of plastic materials that meet inclusion criteria will be  
140 included. All avenues of plastics exposure are considered relevant, including environmental  
141 contact via activities of everyday living, occupational exposure, accidental ingestion through  
142 contaminated food or water, cross-placental exposure, and ingestion through breast milk.

143

144 *Plastics inclusion and exclusion criteria*

145 This scoping review focuses on plastic materials to which humans are generally exposed, other  
146 than at the point of synthesis or product manufacturing. A systematic decision-making process  
147 (Figure 1) will be applied to determine the inclusion or exclusion of plastic chemicals. Briefly,  
148 plastic additives and synthetic polymers will be identified from preselected references: seven  
149 for additives (62–68), and seven for polymers (69–75). Chemicals that are classified as *additive*  
150 – *plasticiser*, *additive – flame retardant*, *per- and polyfluoroalkyl substances (PFAS)*,  
151 *individual polymer* or *polymer class* and *bisphenols* will be included, unless commonly used  
152 in biomedical applications or as food additives (since inclusion would result in the retrieval of  
153 many thousands of references unrelated to the effects of plastic chemicals on health).  
154 Additional plastic chemicals identified during the screening process, or missing plastic  
155 chemicals that are structurally and systematically related to included substances (based on  
156 expert decision by Authors JA and MB, postdoctoral degrees in chemistry), will undergo the  
157 same selection criteria and subsequently included or excluded. Polymer metabolites,  
158 monomers other than bisphenols, and plastic additives other than plasticisers and flame  
159 retardants, are excluded from this review.

160

161 A comprehensive and searchable database of included plastic chemicals will be developed,  
162 indexing the multiple names, synonyms and commonly used terminology describing these  
163 chemicals.

164

165 ***Outcome***

166 Only physiological and psychological changes in human health that are directly measured *in*  
167 *vivo* are included.

168

169 *Human Health Outcome Measures*

170 Health outcome measures include any assessment of change in structure or function of the  
171 human body, whether undertaken at the clinical, functional, physiological or cellular level.  
172 From preliminary searches, we anticipate encountering three types of health-related impact  
173 assessments in relation to plastics exposures:

174

- 175 1. Measures of direct impact on human health as a diagnosis of illness or disease, for  
176 example, breast cancer;
- 177 2. Clinical measures to detect a disease/disorder where no illness/disease has been  
178 diagnosed, for example oestrogen levels as a measure of change in ovarian function;  
179 and
- 180 3. Measures of impact on physiological or biochemical measures within an organ/body  
181 system that are not associated with a specific disorder, for example genetic and  
182 epigenetic changes and measures of metabolism and oxidative stress.

183

184 We will include measures of all the health-related impacts listed above, classifying them within  
185 the body system/organ in which they were investigated, using the hierarchical structure of the  
186 *International Classification of Disease 11<sup>th</sup> Revision (ICD-11) (76)*.

187

188 *Types of sources*

189 This scoping review considers peer-reviewed journal articles presenting primary human  
190 research, inclusive of all study designs. Excluded sources are literature/systematic reviews,  
191 meta-analyses, editorials, book reviews/chapters, perspectives, opinion/commentary pieces,  
192 conference abstracts and proceedings, and grey literature.

193



194 **METHODS**

195

196 *Design*

197 The scoping review uses the methodological framework as described in the *Updated*  
198 *methodological guidance for the conduct of scoping reviews* (77) and reporting will be  
199 compliant with the *Preferred reporting items for systematic reviews and meta-analyses*  
200 *extension for scoping reviews (PRISMA-ScR) Checklist* (78) (see Additional file I for  
201 completed PRISMA-P checklist accompanying this Protocol) and informed by *Conducting*  
202 *high quality scoping reviews – challenges and solutions* (79).

203

204 *Constructing the search strategy*

205 The search strategy aims to find published plastic chemicals/particles and human health studies  
206 from 1960 onwards. The starting point of 1960 was selected since, although large-scale use of  
207 plastic dates back to ~1950, significant increases in global production occurred from the 1960s  
208 onward (5).

209

210 We identified key articles relevant for our scoping review by conducting an initial scoping  
211 search in Medline (Ovid) and Embase (Ovid) databases and examining the hierarchy of  
212 controlled vocabulary in these databases (MeSH and Emtree respectively). Indexed terms were  
213 selected representing plastic materials (including commonly used terms for chemical classes  
214 meeting our inclusion criteria) and a broad range of health outcome categories informed by  
215 preliminary searches and expert input from Author CS, a consultant paediatrician with relevant  
216 research expertise (most human health categories being represented, except for those obviously  
217 unrelated to plastic chemical exposure or likely to result in the retrieval of many irrelevant  
218 results). MeSH and Emtree terms, corresponding text words, text words contained in the titles

219 and abstracts of key articles, and terms and synonyms for all specific plastic chemicals included  
220 in our database, will comprise the final search strategy, being developed in consultation with  
221 Research Librarian, Author TS. A large number of exclusion terms such as “plastic surgery”,  
222 plasticity, etc., will be utilised to minimise irrelevant results.

223

224 In summary, the search strategy will include: Health outcomes AND plastic material exposures  
225 NOT exclusions, limited to English language and dates ranging from 1960 to current. A search  
226 filter will be used in each database (Medline and Embase, via the Ovid platform) to identify  
227 human-only studies and exclude animal studies (80–82). The keywords and indexed terms  
228 representing health outcomes will be combined with Boolean operator OR and combined using  
229 the Boolean Operator AND with the keywords and indexed terms for plastic materials. The  
230 proximity operator ADJ will capture terms adjacent within a tested number of words within  
231 the title and abstract fields, and the truncation symbol \* will be used where appropriate.

232

233 Scopus and Web of Science databases were investigated as sources, however due to the lack  
234 of controlled vocabulary and no filters for human-only studies, these will not be searched.

235

236 In anticipation of a very large number of results from this search, the reference lists of retrieved  
237 papers will not be reviewed. We will, however, review the reference lists associated with a  
238 related ‘Umbrella Review’ of systematic reviews with meta-analyses on this topic, being  
239 conducted by Minderoo Foundation and reported separately (*in preparation*).

240

#### 241 *Study selection*

242 All identified articles will be collated and uploaded into the DistillerSR (Evidence Partners,  
243 Ottawa, Canada) systematic review software application for screening and data extraction, and

244 deduplicated. Relevant articles will then be selected via two screening stages, each preceded  
245 by an in-depth training process for the team of reviewers, who have postgraduate and  
246 postdoctoral degrees in chemistry, biochemistry, environmental and health sciences. Training  
247 will involve the provision of guidelines, including inclusion/exclusion criteria and practical  
248 examples of their application, education on classifying study design, access to our database of  
249 included plastic chemicals and demonstration of the screening process using relevant articles  
250 to be included for the scoping review, ensuring consistency and reliability of assessment  
251 decisions.

252  
253 References will first be screened for relevance by title, abstract and index terms. Reviewers  
254 will initially screen several sets of the same 100 references and discuss their screening  
255 decisions, proceeding to single-screening after achieving an 85% level of agreement with  
256 subsequently agreed (resolved) group decisions over three sets. Articles with no abstract but  
257 potentially relevant to the scoping review will be included at the first screening stage. Auditing  
258 will be performed on a random selection of screened references to evaluate screening accuracy,  
259 and we will use the inbuilt artificial intelligence (DistillerAI) tool to identify possible false  
260 exclusions, re-screening references as necessary and thereby minimising the number of  
261 valuable articles being discarded.

262  
263 During the second screening stage, full-text articles will be reviewed for eligibility. Training  
264 will again involve the screening of several sets of full-texts, with discussions after each set  
265 about screening decisions. Reviewers will proceed to single-screening only after achieving an  
266 85% level of agreement with subsequently resolved group decisions and excluding no more  
267 than two eligible articles in error per 100 full-texts. Eligible articles will be included for data

268 extraction, whereas articles excluded once will require a second reviewer to confirm the  
269 exclusion. Any disagreements will be resolved by a third reviewer with relevant experience.

270

## 271 **DATA EXTRACTION**

272 The data to be extracted will include specific publication details, study characteristics, relevant  
273 plastic exposures detected in the body and the health outcome measures analysed in relation to  
274 plastic exposures. Data extraction forms designed in DistillerSR (drafts are provided in  
275 Additional file II) will be piloted extensively during a period of training, involving independent  
276 reviewing followed by group meetings to discuss decisions and revise forms as necessary (final  
277 versions to be provided in the scoping review paper). Two reviewers will extract data from  
278 each full-text. Reviewer pairs will discuss conflicts that arise, with input from a third reviewer  
279 with the most relevant expertise if assistance is required to resolve decisions. Articles may be  
280 excluded during this phase if found ineligible or if it is impossible to extract data due to  
281 ambiguity or poor reporting quality, with the reasons for exclusion reported in the final paper.

282

283 The findings reported in the included studies, i.e. correlations between plastic exposures and  
284 health outcome measures, or lack thereof, will not be recorded, since we are following the  
285 typical scoping review framework, without conducting quality assessment of retrieved articles.  
286 The afore-mentioned ‘Umbrella Review’ of systematic reviews with meta-analyses will  
287 capture high-level evidence on this topic.

288

## 289 **DATA ANALYSIS AND PRESENTATION**

290 Frequency counts and descriptive statistics will be presented for publication details and study  
291 characteristics. The extracted data will be presented graphically, in diagrammatic and tabular

292 form, in a manner that aligns with the objective of this scoping review. A narrative summary  
293 will accompany the tabulated and charted results.

294  
295 Graphical illustrations will show the trend, by year of publication, for when studies about the  
296 impact of plastics and health were conducted; the number of articles by country of authors and  
297 investigated study populations; age ranges and sex of participants; frequency of the different  
298 study designs used; the plastic chemical/particle exposures and health outcome measures. The  
299 results will be presented to address the research questions, make comparisons, identify  
300 methodologies used and identify research gaps.

301  
302 **DISCUSSION**

303 This scoping review aims to provide a comprehensive overview of research published since  
304 1960 on the exposure of humans to plastic materials and the health outcomes assessed. Due to  
305 the breadth of our review question, we anticipate a large number of studies to intersect with the  
306 PEO framework. A detailed search strategy has been designed to identify eligible studies based  
307 on all three criteria: *in vivo* human populations, directly measured plastic materials that are  
308 included according to clear criteria and scientifically reliable sources, and direct measures of  
309 human health outcomes.

310  
311 While health outcomes traditionally involve diseases and health conditions, the potential  
312 impacts of plastic materials may be subtle, perhaps only becoming apparent over time. By  
313 adapting the ICD-11 sub-categories to include health outcomes not necessarily classified as  
314 disease states (e.g. epigenetic changes and oxidative stress measures), this scoping review aims  
315 to identify a wider suite of health-related outcome measures that should be taken into

316 consideration for plastic exposure research. This database could also benefit future research  
317 endeavours.

318

319 In summary, this scoping review will provide an overview of the research so far undertaken on  
320 plastic material exposure and human health. This can serve as a basis to identify research  
321 clusters, by topic and geographical location of studied populations, as well as knowledge gaps,  
322 helping to prioritise specific areas in need of more in-depth research. Additionally, alongside  
323 the primary outputs, findings may be used to strengthen efforts to better regulate the production,  
324 importation and use of plastic materials that human populations are ubiquitously exposed to.

325

### 326 **Additional (Supplementary) Information**

327 Additional file I: Completed PRISMA-P checklist (PDF)

328 Additional file II: Draft data extraction forms (PDF)

329

### 330 **Figure Titles**

331 Figure 1: Schematic overview of the process for inclusion/exclusion of plastic chemicals in  
332 the scoping review

333 Figure 2: Study selection process

334

### 335 **Abbreviations**

336 ICD-11: *International Classification of Disease 11<sup>th</sup> Revision*

337 JBI: *Joanna Briggs Institute*

338 OSF: *Open Science Framework*

339 PEO: *Population, Exposure and Outcome*

340 PRISMA-ScR: *Preferred reporting items for systematic reviews and meta-analyses extension*  
341 *for scoping reviews*

342

### 343 **Definitions**

344 plastic chemicals: polymers, monomers and/or additives

345 plastic materials: plastic chemicals, plastic products and plastic particles

346

### 347 **Acknowledgements**

348 The selection of specific plastic materials and associated terms was determined in consultation  
349 with polymer science expert Dr Marck Norret, The University of Western Australia. We also  
350 acknowledge the contribution from Brady Johnston, Minderoo Foundation, to create  
351 searchable online databases of our included plastics and health outcome measures, using the  
352 “Shiny” package in RStudio; and from Meredith Ryland and Joanne Webb, Minderoo  
353 Foundation, towards the writing of this manuscript.

354

### 355 **Authors’ contributions**

356 *Scoping review design:* Sarah A. Dunlop, Christos Symeonides, Louise M. Goodes, Delia  
357 Hendrie, Tristan Dale, Hamish Newman, Enoch V.S. Wong, Priyanka Toshniwal

358 *Manuscript:* Louise Goodes, Enoch V.S. Wong, Louise Mofflin, Priyanka Toshniwal,

359 Manuel Brunner, Terena Solomons, Yannick Mulders, Sarah A. Dunlop (guarantor)

360 *Review of Manuscript:* Christos Symeonides, Jennifer Alex, Tristan Dale, Hamish Newman,

361 Andrew Lowe, Delia Hendrie

362 *Identification of plastics and their sources:* Emily White, Jennifer Alex, Christos Symeonides,

363 Andrew Lowe

364 *Classification of study designs, health outcomes and measures:* Bhedita Seewoo, Christos

365 Symeonides, Louise Mofflin

366 *Coding and data management:* Omrik Choudhury, Enoch V.S. Wong

367

### 368 **Funding**

369 This scoping review was supported by Minderoo Foundation.

370

### 371 **Availability of data and materials**

372 All data generated or analysed will be included in the final published scoping review article

373 and additional information related to the protocol will be available upon reasonable request.

374

### 375 **Ethics approval and consent to participate**

376 Formal research ethics approval is not required for scoping review the published literature. The

377 findings of the scoping review will be disseminated via Minderoo Foundation website, peer-

378 reviewed scientific publication, presented at congresses or conferences, to policy makers and

379 stakeholders aiming to achieve a world free of plastic pollution, and through various social

380 media platforms. Data deposition and curation will be managed by Minderoo Foundation.

381

### 382 **Consent for publication**

383 Not applicable.

384

### 385 **Competing interests**

386 The authors declare they have no competing interests and they have developed this protocol

387 without input from any funding body.

388



389

## 390 REFERENCES

- 391 1. Landrigan PJ, Stegeman JJ, Fleming LE, Allemand D, Anderson DM, Backer LC, et  
392 al. Human health and ocean pollution. *Ann Glob Health*. 2020 Dec 3;86(1):1–64.
- 393 2. Bergmann M, Mützel S, Primpke S, Tekman MB, Trachsel J, Gerdts G. White and  
394 wonderful? Microplastics prevail in snow from the Alps to the Arctic. *Sci Adv*. 2019 Aug  
395 14;5(8).
- 396 3. Directive (EU) 2019/904. The reduction of the impact of certain plastic products on  
397 the environment. Off J Eur Union Eur Parliam Counc. L 155/1:1–19.
- 398 4. Fahlman BD. Polymeric Materials. *Mater Chem*. 2018;373–483.
- 399 5. Geyer R, Jambeck JR, Law KL. Production, use, and fate of all plastics ever made.  
400 *Sci Adv*. 2017 Jul 5;3(7):e1700782.
- 401 6. Cózar A, Echevarría F, González-Gordillo JI, Irigoien X, Úbeda B, Hernández-León  
402 S, et al. Plastic debris in the open ocean. *Proc Natl Acad Sci U S A*. 2014 Jul  
403 15;111(28):10239–44.
- 404 7. Van Der Mheen M, Van Sebille E, Pattiaratchi C. Beaching patterns of plastic debris  
405 along the Indian Ocean rim. *Ocean Sci*. 2020 Oct 30;16(5):1317–36.
- 406 8. Jang YC, Lee J, Hong S, Lee JS, Shim WJ, Song YK. Sources of plastic marine  
407 debris on beaches of Korea: More from the ocean than the land. *Ocean Sci J*. 2014 Jul  
408 6;49(2):151–62.
- 409 9. Liao Z, Ji X, Ma Y, Lv B, Huang W, Zhu X, et al. Airborne microplastics in indoor  
410 and outdoor environments of a coastal city in Eastern China. *J Hazard Mater*. 2021 Sep  
411 5;417:126007.

- 412 10. Dris R, Gasperi J, Saad M, Mirande C, Tassin B. Synthetic fibers in atmospheric  
413 fallout: A source of microplastics in the environment? *Mar Pollut Bull.* 2016 Mar 15;104(1–  
414 2):290–3.
- 415 11. Wesch C, Elert AM, Wörner M, Braun U, Klein R, Paulus M. Assuring quality in  
416 microplastic monitoring: About the value of clean-air devices as essentials for verified data.  
417 *Sci Rep.* 2017 Dec 1;7(1):1–8.
- 418 12. Scheurer M, Bigalke M. Microplastics in Swiss Floodplain Soils. *Environ Sci*  
419 *Technol.* 2018 Mar 20;52(6):3591–8.
- 420 13. He P, Chen L, Shao L, Zhang H, Lü F. Municipal solid waste (MSW)landfill: A  
421 source of microplastics? -Evidence of microplastics in landfill leachate. *Water Res.* 2019 Aug  
422 1;159:38–45.
- 423 14. Wahl A, Le Juge C, Davranche M, El Hadri H, Grassl B, Reynaud S, et al.  
424 Nanoplastic occurrence in a soil amended with plastic debris. *Chemosphere.* 2021 Jan  
425 1;262:127784.
- 426 15. Pivokonsky M, Cermakova L, Novotna K, Peer P, Cajthaml T, Janda V. Occurrence  
427 of microplastics in raw and treated drinking water. *Sci Total Environ.* 2018 Dec 1;643:1644–  
428 51.
- 429 16. Mintenig SM, Löder MGJ, Primpke S, Gerdts G. Low numbers of microplastics  
430 detected in drinking water from ground water sources. *Sci Total Environ.* 2019 Jan  
431 15;648:631–5.
- 432 17. Kosuth M, Mason SA, Wattenberg E V. Anthropogenic contamination of tap water,  
433 beer, and sea salt. *PLoS ONE.* 2018 Apr 1;13(4):e0194970.
- 434 18. Lai Y, Dong L, Li Q, Li P, Hao Z, Yu S, et al. Counting Nanoplastics in  
435 Environmental Waters by Single Particle Inductively Coupled Plasma Mass Spectroscopy

- 436 after Cloud-Point Extraction and in Situ Labeling of Gold Nanoparticles. *Environ Sci*  
437 *Technol.* 2021 Apr 20;55(8):4783–91.
- 438 19. de Sousa FDB. The role of plastic concerning the sustainable development goals: The  
439 literature point of view. *Clean Responsible Consum.* 2021 Dec 1;3:100020.
- 440 20. Enyoh CE, Shafea L, Verla AW, Verla EN, Qingyue W, Chowdhury T, et al.  
441 Microplastics exposure routes and toxicity studies to ecosystems: An overview. Vol. 35,  
442 *Environmental Health and Toxicology*. Korean Society of Environmental Health and  
443 Toxicology; 2020.
- 444 21. Pauly JL, Stegmeier SJ, Allaart HA, Cheney RT, Zhang PJ, Mayer AG, et al. Inhaled  
445 cellulosic and plastic fibers found in human lung tissue. *Cancer Epidemiol Biomarkers Prev.*  
446 1998 May 1;7(5):419–28.
- 447 22. Dar E, Kanarek MS, Anderson HA, Sonzogni WC. Fish consumption and  
448 reproductive outcomes in Green Bay, Wisconsin. *Environ Res.* 1992 Oct 1;59(1):189–201.
- 449 23. Anderson HA, Wolff MS, Lilis R, Holstein EC, Valciukas JA, Anderson KE, et al.  
450 Symptoms and clinical abnormalities following ingestion of polybrominated-biphenyl-  
451 contaminated food products. *Ann N Y Acad Sci.* 1979;320(1):684–702.
- 452 24. Jamieson DJ, Terrell ML, Aguocha NN, Small CM, Cameron LL, Marcus M. Dietary  
453 exposure to brominated flame retardants and abnormal pap test results. *J Womens Health.*  
454 2011 Sep 1;20(9):1269–78.
- 455 25. Lv Y, Lu S, Dai Y, Rui C, Wang Y, Zhou Y, et al. Higher dermal exposure of  
456 cashiers to BPA and its association with DNA oxidative damage. *Environ Int.* 2017 Jan  
457 1;98:69–74.
- 458 26. Lazarov A, Cordoba M. Purpuric contact dermatitis in patients with allergic reaction  
459 to textile dyes and resins. *J Eur Acad Dermatol Venereol.* 2000;14(2):101–5.

- 460 27. Majasuo S, Liippo J, Lammintausta K. Non-occupational contact sensitization to  
461 epoxy resin of bisphenol A among general dermatology patients. *Contact Dermatitis*. 2012  
462 Mar;66(3):148–53.
- 463 28. Breton CV, Landon R, Kahn LG, Enlow MB, Peterson AK, Bastain T, et al.  
464 Exploring the evidence for epigenetic regulation of environmental influences on child health  
465 across generations. *Commun Biol*. 2021 Jun 22;4(1):1–15.
- 466 29. Chao H-R, Wang S-L, Lee W-J, Wang Y-F, Pöpke O. Levels of polybrominated  
467 diphenyl ethers (PBDEs) in breast milk from central Taiwan and their relation to infant birth  
468 outcome and maternal menstruation effects. *Environ Int*. 2007 Feb 1;33(2):239–45.
- 469 30. Wiesinger H, Wang Z, Hellweg S. Deep Dive into Plastic Monomers, Additives, and  
470 Processing Aids. *Environ Sci Technol*. 2021 Jul 6;55(13):9339–51.
- 471 31. Jackson E, Shoemaker R, Larian N, Cassis L. Adipose Tissue as a Site of Toxin  
472 Accumulation. *Compr Physiol*. 2017 Oct 1;7(4):1085–135.
- 473 32. Lithner D, Larsson A, Dave G. Environmental and health hazard ranking and  
474 assessment of plastic polymers based on chemical composition. *Sci Total Environ*. 2011 Aug  
475 15;409(18):3309–24.
- 476 33. Demeneix BA. Evidence for Prenatal Exposure to Thyroid Disruptors and Adverse  
477 Effects on Brain Development. *Eur Thyroid J*. 2019 Dec 1;8(6):283–92.
- 478 34. Vandenberg L, Colborn T, Hayes T, Heindel J, Jacobs D, Lee D, et al. Hormones and  
479 endocrine-disrupting chemicals: low-dose effects and nonmonotonic dose responses. *Endocr*  
480 *Rev*. 2012 Jun;33(3):378–455.
- 481 35. Vethaak AD, Legler J. Microplastics and human health. *Science*.  
482 2021;371(6530):672–4.
- 483 36. Davison SMC, White MP, Pahl S, Taylor T, Fielding K, Roberts BR, et al. Public  
484 concern about, and desire for research into, the human health effects of marine plastic

- 485 pollution: Results from a 15-country survey across Europe and Australia. *Glob Environ*  
486 *Change*. 2021 Jun 17;102309.
- 487 37. Manini P, Andreoli R, Niessen W. Liquid chromatography-mass spectrometry in  
488 occupational toxicology: a novel approach to the study of biotransformation of industrial  
489 chemicals. *J Chromatogr A*. 2004 Nov 26;1058(1–2):21–37.
- 490 38. Tanner EM, Hallerbäck MU, Wikström S, Lindh C, Kiviranta H, Gennings C, et al.  
491 Early prenatal exposure to suspected endocrine disruptor mixtures is associated with lower  
492 IQ at age seven. *Environ Int*. 2020 Jan 1;134:105185.
- 493 39. Fu X, Xu J, Zhang R, Yu J. The association between environmental endocrine  
494 disruptors and cardiovascular diseases: A systematic review and meta-analysis. *Environ Res*.  
495 2020 Aug 1;187:109464.
- 496 40. Gore AC, Chappell VA, Fenton SE, Flaws JA, Nadal A, Prins GS, et al. EDC-2: The  
497 Endocrine Society’s Second Scientific Statement on Endocrine-Disrupting Chemicals.  
498 *Endocr Rev*. 2015 Dec 1;36(6):E1–150.
- 499 41. Cai H, Zheng W, Zheng P, Wang S, Tan H, He G, et al. Human urinary/seminal  
500 phthalates or their metabolite levels and semen quality: A meta-analysis. *Environ Res*. 2015  
501 Oct 1;142:486–94.
- 502 42. Golestanzadeh M, Riahi R, Kelishadi R. Association of phthalate exposure with  
503 precocious and delayed pubertal timing in girls and boys: a systematic review and meta-  
504 analysis. *Environ Sci Process Impacts*. 2020 Apr 29;22(4):873–94.
- 505 43. Boffetta P, Catalani S, Tomasi C, Pira E, Apostoli P. Occupational exposure to  
506 polychlorinated biphenyls and risk of cutaneous melanoma: A meta-analysis. *Eur J Cancer*  
507 *Prev*. 2018 Jan 1;27(1):62–9.

- 508 44. Zhang K, Shi H, Peng J, Wang Y, Xiong X, Wu C, et al. Microplastic pollution in  
509 China's inland water systems: A review of findings, methods, characteristics, effects, and  
510 management. *Sci Total Environ*. 2018 Jul 15;630:1641–53.
- 511 45. Kim KY, Lee E, Kim Y. The Association between Bisphenol A Exposure and Obesity  
512 in Children-A Systematic Review with Meta-Analysis. *Int J Environ Res Public Health*. 2019  
513 Jul 15;16(14):E2521.
- 514 46. Lam J, Lanphear BP, Bellinger D, Axelrad DA, McPartland J, Sutton P, et al.  
515 Developmental pbde exposure and IQ/ADHD in childhood: A systematic review and meta-  
516 analysis. *Environ Health Perspect*. 2017 Aug 1;125(8).
- 517 47. Radke EG, Braun JM, Nachman RM, Cooper GS. Phthalate exposure and  
518 neurodevelopment: A systematic review and meta-analysis of human epidemiological  
519 evidence. *Environ Int*. 2020 Apr 1;137:105408.
- 520 48. Braun JM. Early-life exposure to EDCs: role in childhood obesity and  
521 neurodevelopment. *Nat Rev Endocrinol* 2016 133. 2016 Nov 18;13(3):161–73.
- 522 49. SAPEA A. Scientific Perspective on Microplastics in Nature and Society. *Sci Advice*  
523 *Policy Eur Acad Berl*. 2019;
- 524 50. World Health Organization. Microplastics in drinking-water [Internet]. 2019 p. 1–  
525 101. Report No.: 9789241516198. Available from:  
526 <https://apps.who.int/iris/handle/10665/326499>
- 527 51. Leslie HA, Depledge MH. Where is the evidence that human exposure to  
528 microplastics is safe? *Environ Int*. 2020 Sep 1;142:105807.
- 529 52. Gómez-Mercado CA, Mejía-Sandoval G, Segura-Cardona ÁM, Arango-Alzate CM,  
530 Hernández-González SI, Patiño-García DF, et al. Exposición a Bisfenol A (BPA) en mujeres  
531 embarazadas y su relación con la obesidad en sus hijos: revisión sistemática. *Rev Fac Nac*  
532 *Salud Pública*. 2018 Mar 31;36(1):66–74.

- 533 53. Ejaredar M, Lee Y, Roberts DJ, Sauve R, Dewey D. Bisphenol A exposure and  
534 children's behavior: A systematic review. *J Expo Sci Environ Epidemiol* 2017 272. 2016 Mar  
535 9;27(2):175–83.
- 536 54. Jeddi MZ, Janani L, Memari AH, Akhondzadeh S, yunesian M. The role of phthalate  
537 esters in autism development: A systematic review. *Environ Res.* 2016 Nov 1;151:493–504.
- 538 55. Zarean M, Keikha M, Feizi A, Kazemitabae M, Kelishadi R. The role of exposure to  
539 phthalates in variations of anogenital distance: A systematic review and meta-analysis.  
540 *Environ Pollut.* 2019 Apr 1;247:172–9.
- 541 56. Rochester JR. Bisphenol A and human health: A review of the literature. *Reprod*  
542 *Toxicol.* 2013 Dec 1;42:132–55.
- 543 57. Hauser R, Calafat AM. Phthalates and human health. *Occup Environ Med.* 2005 Nov  
544 1;62(11):806–18.
- 545 58. Wu M, Tu C, Liu G, Zhong H. Time to Safeguard the Future Generations from the  
546 Omnipresent Microplastics. *Bull Environ Contam Toxicol* [Internet]. 2021 Jul 5 [cited 2021  
547 Aug 17]; Available from: <https://doi.org/10.1007/s00128-021-03252-1>
- 548 59. Velis CA, Cook E. Mismanagement of Plastic Waste through Open Burning with  
549 Emphasis on the Global South: A Systematic Review of Risks to Occupational and Public  
550 Health. *Environ Sci Technol.* 2021;55:7186–207.
- 551 60. Lebreton L, Andrady A. Future scenarios of global plastic waste generation and  
552 disposal. *Palgrave Commun* 2019 51. 2019 Jan 29;5(1):1–11.
- 553 61. Johannes HP, Kojima M, Iwasaki F, Edita EP. Applying the extended producer  
554 responsibility towards plastic waste in Asian developing countries for reducing marine plastic  
555 debris. *Waste Manag Res J Int Solid Wastes Public Clean Assoc ISWA.* 2021  
556 May;39(5):690–702.

- 557 62. ECHA (European Chemicals Agency). Mapping exercise – Plastic additives initiative  
558 [Internet]. European Chemicals Agency. [cited 2020 Jul 21]. Available from:  
559 <https://echa.europa.eu/de/mapping-exercise-plastic-additives-initiative#table>
- 560 63. ECHA (European Chemicals Agency). Candidate list of substances of very high  
561 concern for authorisation [Internet]. European Chemicals Agency. 2021 [cited 2020 Jul 21].  
562 Available from: <https://echa.europa.eu/candidate-list-table>
- 563 64. ECHA (European Chemicals Agency). Substances restricted under REACH  
564 [Internet]. [cited 2020 Jul 21]. Available from: [https://echa.europa.eu/de/substances-](https://echa.europa.eu/de/substances-restricted-under-reach)  
565 [restricted-under-reach](https://echa.europa.eu/de/substances-restricted-under-reach)
- 566 65. Stockholm Convention. Stockholm Convention on persistent organic pollutants  
567 (POPs) [Internet]. UN Environment Programme; 2019 [cited 2020 Jul 21]. Available from:  
568 <http://chm.pops.int/TheConvention/Overview/TextoftheConvention/tabid/2232/Default.aspx>
- 569 66. Stockholm Convention. POPRC recommendations for listing chemicals [Internet].  
570 2019 [cited 2020 Jul 21]. Available from:  
571 <http://chm.pops.int/Convention/POPsReviewCommittee/Chemicals/tabid/243/Default.aspx>
- 572 67. Groh KJ, Backhaus T, Carney-Almroth B, Geueke B, Inostroza PA, Lennquist A, et  
573 al. Overview of known plastic packaging-associated chemicals and their hazards. *Sci Total*  
574 *Environ.* 2019 Jul;651:3253–68.
- 575 68. ATSDR (Agency for Toxic Substances and Disease Registry). ATSDR’s Substance  
576 Priority List [Internet]. 2020 [cited 2020 Jul 16]. Available from:  
577 <https://www.atsdr.cdc.gov/spl/index.html>
- 578 69. CROW (Chemical Retrieval on the Web). CROW Polymer Science [Internet]. CROW  
579 Polymer Science. 2021 [cited 2021 Apr 27]. Available from:  
580 <https://www.polymerdatabase.com/>



- 581 70. Wypych G. Handbook of Polymers [Internet]. Second edition. Toronto: ChemTec  
582 Publishing; 2016. 706 p. Available from:  
583 <https://www.sciencedirect.com/science/article/pii/B9781895198928500021>
- 584 71. Lithner D, Larsson A, Dave G. Environmental and health hazard ranking and  
585 assessment of plastic polymers based on chemical composition. *Sci Total Environ*. 2011  
586 Aug;409(18):3309–24.
- 587 72. Koltzenburg S, Maskos M, Nuyken O. Polymer Chemistry [Internet]. Berlin  
588 Heidelberg: Springer-Verlag; 2017. Available from:  
589 <https://www.springer.com/gp/book/9783662492772>
- 590 73. Ravve A. Principles of Polymer Chemistry [Internet]. 3rd ed. New York: Springer-  
591 Verlag; 2012. Available from: <https://www.springer.com/gp/book/9781461422112>
- 592 74. Braun D, Cherdrón H, Rehahn M, Ritter H, Voit B. Polymer Synthesis: Theory and  
593 Practice: Fundamentals, Methods, Experiments [Internet]. 5th ed. Berlin Heidelberg:  
594 Springer-Verlag; 2013. Available from: <https://www.springer.com/gp/book/9783642289798>
- 595 75. Salamone JC. Polymeric Materials Encyclopedia [Internet]. Vol. 9. London New  
596 York: CRC Press; 1996. 554 p. Available from:  
597 <https://books.google.com.au/books?id=oYHJ-imh7rgC>
- 598 76. World Health, Organization (WHO). International Classification of Diseases,  
599 Eleventh Revision (ICD-11) [Internet]. 2019. Available from: <https://icd.who.int/browse11>.  
600 Licensed under Creative Commons Attribution-NoDerivatives 3.0 IGO licence (CC BY-ND  
601 3.0 IGO).
- 602 77. Peters MDJ, Marnie C, Tricco AC, Pollock D, Munn Z, Alexander L, et al. Updated  
603 methodological guidance for the conduct of scoping reviews. *JBI Evid Synth*. 2020 Oct  
604 1;18(10):2119–26.

- 605 78. Tricco AC, Lillie E, Zarin W, O'Brien KK, Colquhoun H, Levac D, et al. PRISMA  
606 Extension for Scoping Reviews (PRISMA-ScR): Checklist and Explanation.  
607 <https://doi.org/10.7326/M18-0850>. 2018 Sep 4;169(7):467–73.
- 608 79. Khalil H, Peters MDJ, Tricco AC, Pollock D, Alexander L, McInerney P, et al.  
609 Conducting high quality scoping reviews-challenges and solutions. *J Clin Epidemiol*. 2021  
610 Feb 1;130:156–60.
- 611 80. Venn M. Subject Guides: Systematic Reviews for Health: 8. Search Limits [Internet].  
612 2020. Available from: <https://utas.libguides.com/SystematicReviews/SearchLimits>
- 613 81. Bramer W, Fowler S, Ket J, Otten R, Riphagen I. Animal studies exclusion - bmi-  
614 online search blocks [Internet]. Biomedische Informatie. 2020. Available from:  
615 <https://blocks.bmi-online.nl/catalog/16>
- 616 82. Tessier V. Human studies [Internet]. CHLA Canadian Health Libraries Association.  
617 2019. Available from:  
618 <https://extranet.santecom.qc.ca/wiki/!biblio3s/doku.php?id=concepts:etudes-sur-les-humains>  
619



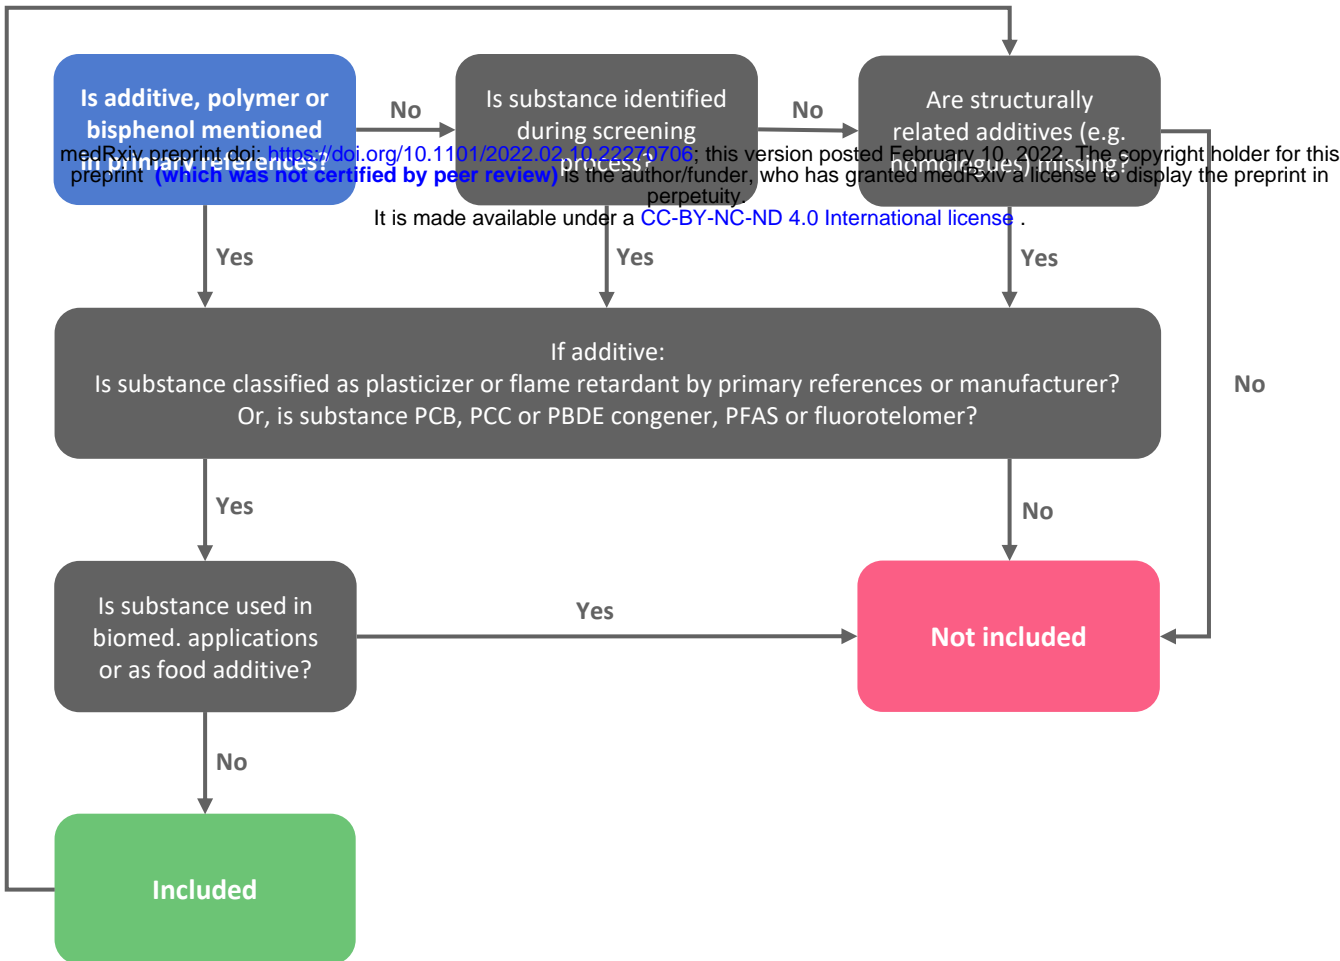

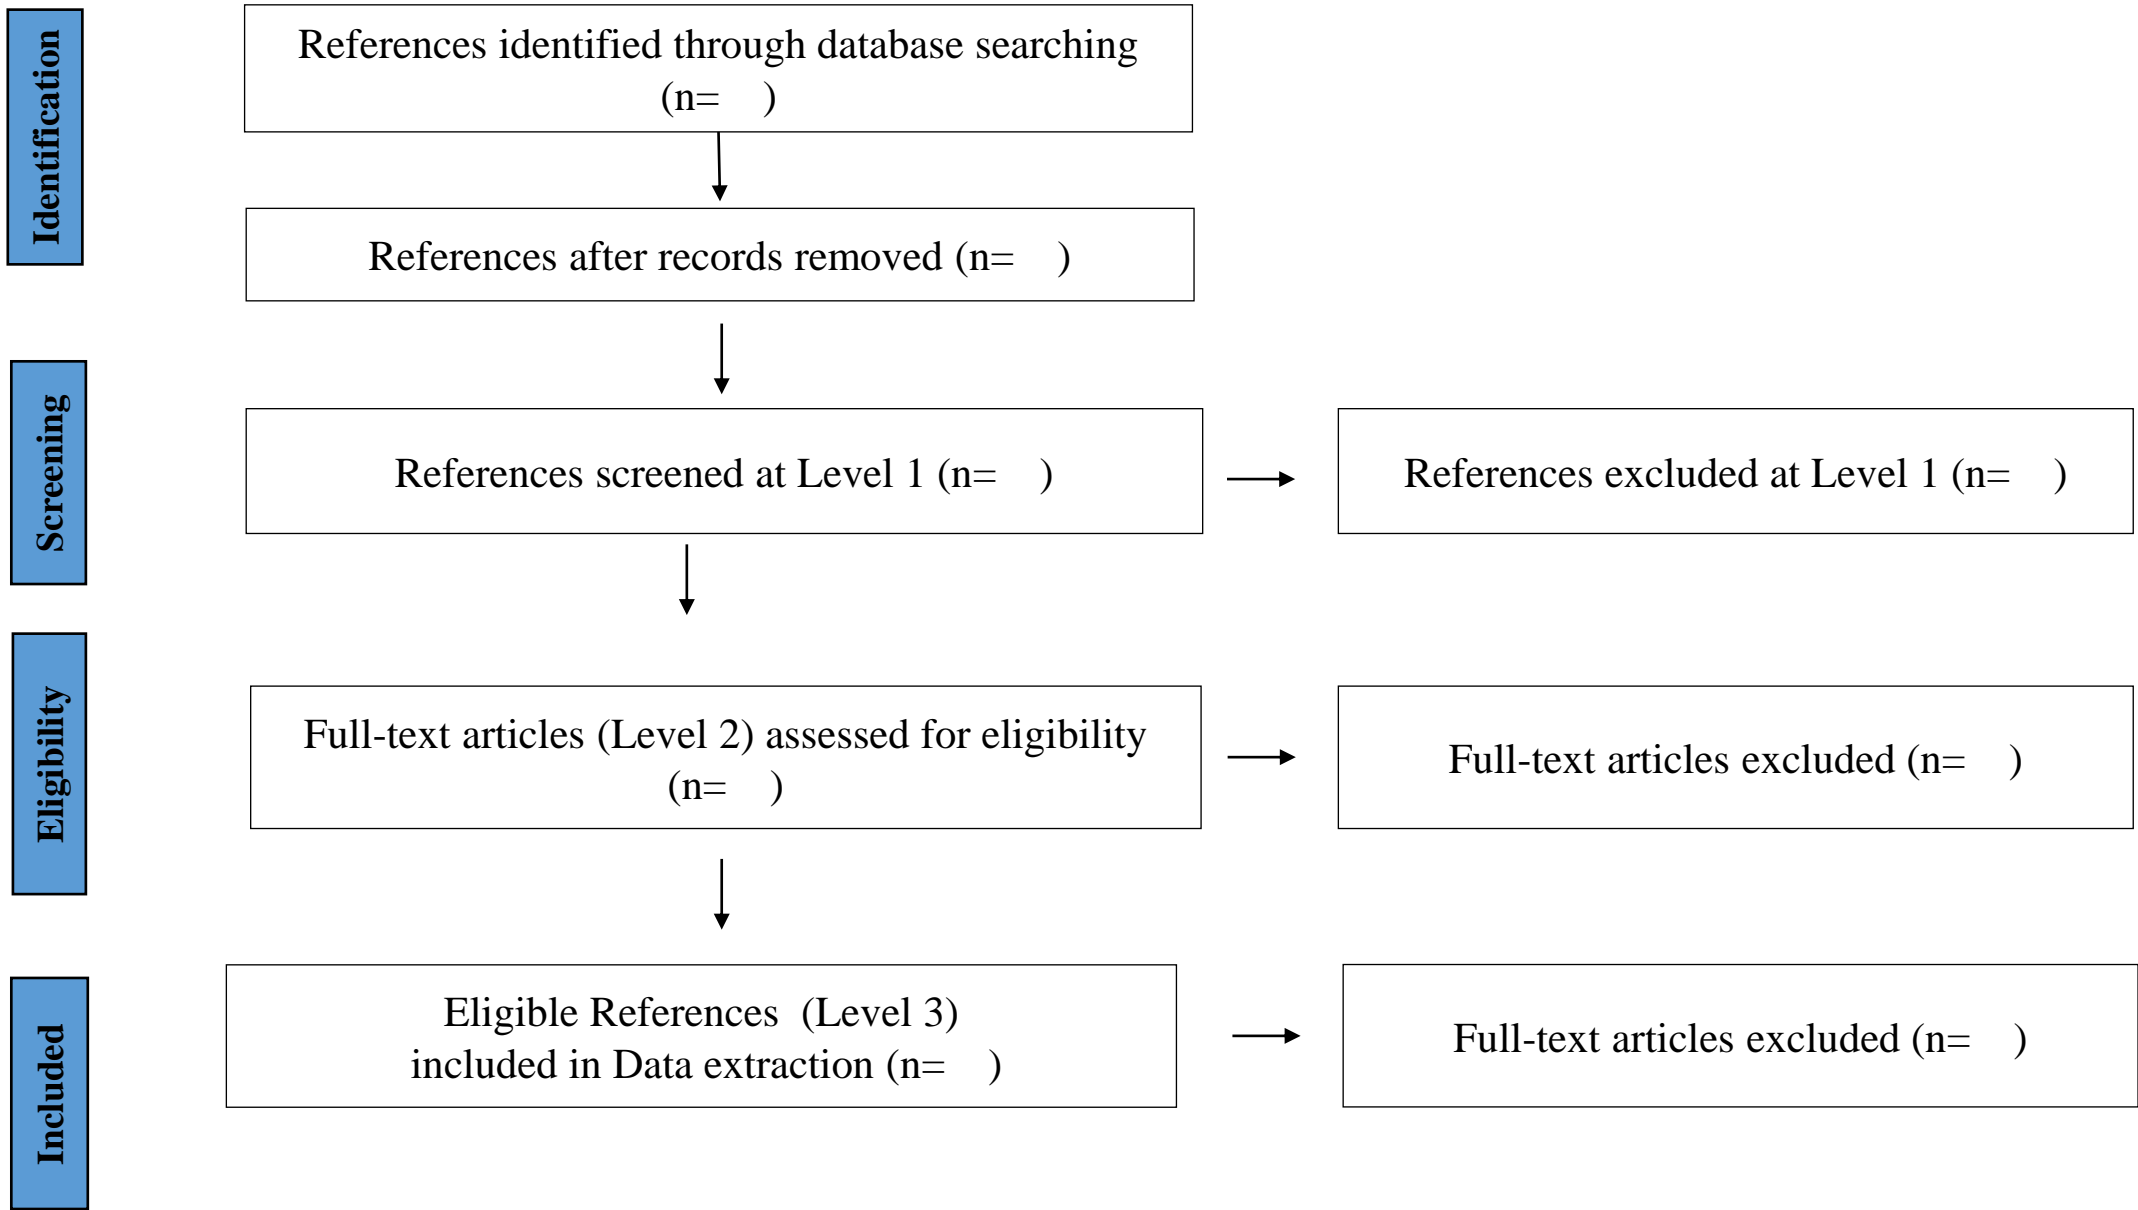

Source: https://www.medrxiv.org/content/10.1101/2022.02.10.22270706v1.full.pdf
